# Supplementary material for: 2,2′-Bipyridyl formation from 2-arylpyridines through bimetallic diyttrium intermediate
Source: PubMed Central journal article supplement (PMC5510530; doi:10.1039/c5sc01599e), 2015-07-17
Supplement: SC-006-C5SC01599E-s001.pdf [file SC-006-C5SC01599E-s001.pdf]

## Supporting Information for

### 2,2'-Bipyridyl Formation from 2-Arylpyridines through Bimetallic Dyttrium Intermediate

Yu Shibata, Haruki Nagae, Shiki Sumiya, Raphaël Rochat, Hayato Tsurugi,\*

and Kazushi Mashima\*

*Department of Chemistry, Graduate School of Engineering Science, Osaka University, and  
CREST, JST, Toyonaka, Osaka 560-8531, Japan*

**General:** All manipulations involving air- and moisture-sensitive organometallic compounds were performed under argon using the standard Schlenk technique or an argon-filled glovebox. ArNHCH<sub>2</sub>CH<sub>2</sub>NHAr (Ar = 2,6-*i*-Pr<sub>2</sub>C<sub>6</sub>H<sub>3</sub>),<sup>S1</sup> Y(CH<sub>2</sub>SiMe<sub>3</sub>)<sub>3</sub>(THF)<sub>2</sub>,<sup>S2</sup> Y(ArNCH<sub>2</sub>CH<sub>2</sub>NAr)(CH<sub>2</sub>SiMe<sub>3</sub>)<sub>3</sub>(THF)<sub>2</sub> (**1**),<sup>S3</sup> 2-(4-methylphenyl)pyridine (**2b**), and 2-phenylpyridine-*d*<sub>5</sub><sup>S4</sup> were prepared according to the literature procedure. Other pyridine derivatives were purchased and distilled over CaH<sub>2</sub>. Anhydrous pentane, hexane, toluene, and THF were purchased from Kanto Chemical and further purified by passage through activated alumina columns under positive argon pressure as described by Grubbs *et al.*<sup>S5</sup> Benzene, (Me<sub>3</sub>Si)<sub>2</sub>O, benzene-*d*<sub>6</sub>, toluene-*d*<sub>8</sub>, and THF-*d*<sub>8</sub> were dried over CaH<sub>2</sub> and stored in glove box. <sup>1</sup>H NMR (400 MHz) and <sup>13</sup>C NMR (100 MHz) spectra were measured on a BRUKER AVANCEIII-400 spectrometer. Assignment of <sup>1</sup>H and <sup>13</sup>C{<sup>1</sup>H} NMR peaks for some of the complexes was facilitated by 2D <sup>1</sup>H-<sup>1</sup>H COSY, 2D <sup>1</sup>H-<sup>1</sup>H NOESY, 2D <sup>1</sup>H-<sup>13</sup>C HMQC, and 2D <sup>1</sup>H-<sup>13</sup>C HMBC spectra. Elemental analyses were performed on a Perkin-Elmer 2400 microanalyzer at the Faculty of Engineering Science, Osaka University.

### **Preparation of Dyttrium Complex Bridged by 6,6'-diphenyl-2,2'-bipyridyl (4a):**

A solution of 2-phenylpyridine (**2a**, 11.0 mg, 0.072 mmol) in benzene (0.5 mL) was added to a solution of **1** (50.0 mg, 0.072 mmol) in benzene (0.5 mL) by pipet. The color of the solution turned to green with green-colored powders. The solution was standing for 26 days, and large green crystals were precipitated. After decantation and washing with benzene (1 mL x 2) and pentane (1 mL), dark-green powders of **4a** were obtained quantitatively (51.6 mg, 0.0364 mmol). mp: 116–120 °C (dec.). The dark-green powders were insoluble in non-polar solvents such as C<sub>6</sub>D<sub>6</sub> and C<sub>6</sub>D<sub>5</sub>CD<sub>3</sub>. Anal Calcd for (C<sub>82</sub>H<sub>106</sub>N<sub>6</sub>O<sub>2</sub>Y<sub>2</sub>)·(C<sub>6</sub>H<sub>6</sub>): C, 72.21; H, 7.71; N, 5.74. Found: C, 72.56; H, 7.82; N, 5.50.

### **Preparation of 4b:**

Complex **4b** was obtained quantitatively (52 mg, 0.036 mmol), following similar procedure to the synthesis of **4a**: mp: 116–120 °C (dec.). Anal Calcd for (C<sub>84</sub>H<sub>110</sub>N<sub>6</sub>O<sub>2</sub>Y<sub>2</sub>)·(C<sub>6</sub>H<sub>6</sub>): C, 72.46; H, 7.84; N, 5.63. Found: C, 72.75; H, 7.79; N, 5.32.

### **Preparation of 4c:**

A solution of 2-(4-methoxyphenyl)pyridine (**2c**, 13.0 mg, 0.072 mmol) in benzene (0.5 mL) was added to a solution of **1** (50.0 mg, 0.072 mmol) in benzene (0.5 mL) by pipet in an Ar-filled glovebox. The reaction mixture was heated to 50 °C for 68 h to become green suspension. After decantation and washing with benzene (1 mL x 4) and pentane (1 mL), dark-green powders of **4c** were obtained in 36% yield (18.8 mg, 1.29 x 10<sup>-2</sup> mmol). mp: 118–125 °C (dec.). Anal. Calcd. for (C<sub>82</sub>H<sub>106</sub>N<sub>6</sub>O<sub>2</sub>Y<sub>2</sub>)·(C<sub>6</sub>H<sub>6</sub>)<sub>2</sub>: C, 71.98; H, 7.68; N, 5.25. Found: C, 71.60; H, 7.70; N, 5.49.

### Preparation of (ArNCH<sub>2</sub>CH<sub>2</sub>NAr)Y(2-pyridylphenyl)(THF)<sub>2</sub> (**3a**):

A solution of 2-phenylpyridine (**2a**, 22.3 mg, 0.144 mmol) in THF (1 mL) was added to a solution of complex **1** (100 mg, 0.144 mmol) in THF (1 mL) at room temperature by pipet in an Ar-filled glovebox, and the reaction mixture was stirred for 216 h. All of the solvent

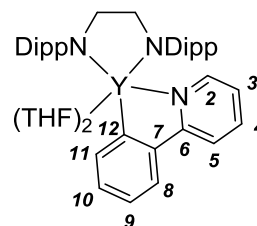

evaporated under reduced pressure, and the residue was washed with (Me<sub>3</sub>Si)<sub>2</sub>O (1 mL x 5). By drying the formed precipitates in vacuo, yellow powders of **3a** were obtained in 98% yield (107 mg, 0.141 mmol). mp: 72–76 °C (dec.). <sup>1</sup>H NMR (400 MHz, THF-*d*<sub>8</sub>, 30 °C) δ 8.26 (d, <sup>3</sup>J<sub>H-H</sub> = 6.5 Hz, 1H, H<sup>11</sup> of *PhPy*), 8.20 (d, <sup>3</sup>J<sub>H-H</sub> = 4.6 Hz, 1H, H<sup>2</sup> of *PhPy*), 8.02 (d, <sup>3</sup>J<sub>H-H</sub> = 8.3 Hz, 1H, H<sup>8</sup> of *PhPy*), 7.77 (d, <sup>3</sup>J<sub>H-H</sub> = 7.7 Hz, 1H, H<sup>5</sup> of *PhPy*), 7.74 (t, <sup>3</sup>J<sub>H-H</sub> = 7.7 Hz, 1H, H<sup>4</sup> of *PhPy*), 7.69–7.12 (m, 3H, H<sup>10</sup>, H<sup>9</sup>, and H<sup>3</sup> of *PhPy*), 6.83 (d, <sup>3</sup>J<sub>H-H</sub> = 7.5 Hz, 4H, *m*-H of 2,6-*i*-Pr<sub>2</sub>C<sub>6</sub>H<sub>3</sub>), 6.65 (t, <sup>3</sup>J<sub>H-H</sub> = 7.5 Hz, 2H, *p*-H of 2,6-*i*-Pr<sub>2</sub>C<sub>6</sub>H<sub>3</sub>), 4.09 (sept, <sup>3</sup>J<sub>H-H</sub> = 6.8 Hz, 4H, CH(CH<sub>3</sub>)<sub>2</sub>), 3.78 (s, 4H, N-CH<sub>2</sub>), 3.61 (m, 8H, THF), 1.77 (q, <sup>3</sup>J<sub>H-H</sub> = 3.2 Hz, 8H, THF), 1.04 (d, <sup>3</sup>J<sub>H-H</sub> = 6.8 Hz, 24H, CH(CH<sub>3</sub>)<sub>2</sub>). <sup>13</sup>C NMR (100 MHz, THF-*d*<sub>8</sub>, 30 °C) δ 190.3 (d, <sup>1</sup>J<sub>Y-C</sub> = 48.8 Hz, Y-C), 165.0 (C<sup>6</sup> of *PhPy*), 156.5 (*ipso*-C of 2,6-*i*-Pr<sub>2</sub>C<sub>6</sub>H<sub>3</sub>), 146.8 (C<sup>2</sup> of *PhPy*), 144.4 (C<sup>7</sup> of *PhPy*), 143.7 (*o*-C of 2,6-*i*-Pr<sub>2</sub>C<sub>6</sub>H<sub>3</sub>), 137.8 (C<sup>11</sup> of *PhPy*), 137.8 (C<sup>4</sup> of *PhPy*), 125.8 (C<sup>10</sup> of *PhPy*), 123.4 (C<sup>9</sup> of *PhPy*), 122.2 (C<sup>8</sup> of *PhPy*), 121.2 (*m*-C of 2,6-*i*-Pr<sub>2</sub>C<sub>6</sub>H<sub>3</sub>), 119.4 (C<sup>3</sup> of *PhPy*), 118.9 (*p*-C of 2,6-*i*-Pr<sub>2</sub>C<sub>6</sub>H<sub>3</sub>), 118.7 (C<sup>5</sup> of *PhPy*), 66.3 (THF), 59.6 (N-CH<sub>2</sub>), 26.5 (CH(CH<sub>3</sub>)<sub>2</sub>), 24.4 (CH(CH<sub>3</sub>)<sub>2</sub>), 23.4 (THF). Anal. Calcd. for C<sub>45</sub>H<sub>60</sub>N<sub>3</sub>O<sub>2</sub>Y: C, 70.75; H, 7.92; N, 5.50. Found: C, 70.38; H, 8.17; N, 5.68.

### Preparation of (ArNCH<sub>2</sub>CH<sub>2</sub>NAr)Y(2-pyridyl-4-MeOC<sub>6</sub>H<sub>3</sub>)(THF)<sub>2</sub> (**3c**):

Complex **1** (50.2 mg, 0.0720 mmol) and 2-(4-methoxyphenyl)pyridine (**2c**, 13.3 mg, 0.0718 mmol) were dissolved in benzene (0.5 mL) in an Ar-filled glovebox. The reaction mixture was stirred at room

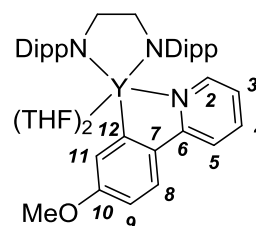

temperature for 3 h. After evaporating the solvent and washing with pentane (1 mL x 2), yellow powders of **3c** were obtained in 83% yield (47.7 mg, 0.0601 mmol). mp: 91–96 °C (dec.). <sup>1</sup>H NMR (400 MHz, C<sub>6</sub>D<sub>6</sub>, 30 °C) δ 8.09 (brs, 1H, H<sup>2</sup> of Arpy), 7.79-7.65 (m, 2H, H<sup>11</sup> and H<sup>8</sup> of Arpy), 7.49 (d, <sup>3</sup>J<sub>H-H</sub> = 8.3 Hz, 1H, H<sup>5</sup> of Arpy), 7.22 (d, <sup>3</sup>J<sub>H-H</sub> = 7.5 Hz, 4H, *m*-H of 2,6-*i*-Pr<sub>2</sub>C<sub>6</sub>H<sub>3</sub>), 7.10 (d, <sup>3</sup>J<sub>H-H</sub> = 7.5 Hz, 2H, *p*-H of 2,6-*i*-Pr<sub>2</sub>C<sub>6</sub>H<sub>3</sub>), 7.01 (m, 1H, H<sup>4</sup> of Arpy), 6.82 (d, <sup>3</sup>J<sub>H-H</sub> = 8.3 Hz, 1H, H<sup>9</sup> of Arpy), 6.39 (t, <sup>3</sup>J<sub>H-H</sub> = 6.2 Hz, 1H, H<sup>3</sup> of Arpy), 4.26-4.10 (m, 8H, N-CH<sub>2</sub> and CH(CH<sub>3</sub>)<sub>2</sub>), 3.61 (s, 3H, OCH<sub>3</sub>), 3.40 (brs, 8H, THF), 1.30 (d, <sup>3</sup>J<sub>H-H</sub> = 6.7 Hz, 24H, CH(CH<sub>3</sub>)<sub>2</sub>), 1.09 (brs, 8H, THF). <sup>13</sup>C NMR (100 MHz, C<sub>6</sub>D<sub>6</sub>, 30 °C) δ 194.1 (d, <sup>1</sup>J<sub>Y-C</sub> = 46.8 Hz, Y-C<sup>12</sup>), 166.0 (d, <sup>2</sup>J<sub>Y-C</sub> = 2.4 Hz, C<sup>6</sup> of ArPy), 159.7 (d, <sup>2</sup>J<sub>Y-C</sub> = 1.3 Hz, C<sup>7</sup> of Arpy), 156.8 (*ipso*-C of 2,6-*i*-Pr<sub>2</sub>C<sub>6</sub>H<sub>3</sub>), 147.7 (C<sup>2</sup> of Arpy), 145.1 (*o*-C of 2,6-*i*-Pr<sub>2</sub>C<sub>6</sub>H<sub>3</sub>), 138.6 (C<sup>4</sup> of Arpy), 133.9 (C<sup>10</sup> of Arpy), 125.3 (C<sup>8</sup> of Arpy), 123.3 (*m*-C of 2,6-*i*-Pr<sub>2</sub>C<sub>6</sub>H<sub>3</sub>), 123.2 (C<sup>11</sup> of Arpy), 121.3 (*p*-C of 2,6-*i*-Pr<sub>2</sub>C<sub>6</sub>H<sub>3</sub>), 119.2 (C<sup>3</sup> and C<sup>5</sup> of Arpy), 111.8 (C<sup>9</sup> of Arpy), 69.8 (THF), 60.7 (N-CH<sub>2</sub>), 54.6 (OCH<sub>3</sub>), 28.3 (CH(CH<sub>3</sub>)<sub>2</sub>), 25.6 (CH(CH<sub>3</sub>)<sub>2</sub>), 25.0 (THF). Anal. Calcd for C<sub>46</sub>H<sub>62</sub>N<sub>3</sub>O<sub>3</sub>Y<sub>2</sub>: C, 69.59; H, 7.87; N, 5.29. Found: C, 69.30; H, 7.96; N, 5.63.

### Preparation of (ArNCH<sub>2</sub>CH<sub>2</sub>NAr)Y(2-pyridyl-4-CF<sub>3</sub>C<sub>6</sub>H<sub>3</sub>)(THF)<sub>2</sub> (**3d**):

Complex **3d** was obtained in 83% yield (49.5 mg, 0.0595 mmol),

following similar procedure to the synthesis of **3c**. mp: 94-99 °C

(dec.). <sup>1</sup>H NMR (400 MHz, C<sub>6</sub>D<sub>6</sub>, 30 °C) δ 8.56 (s, 1H, H<sup>11</sup> of Arpy),

8.33 (d, <sup>3</sup>J<sub>H-H</sub> = 4.8 Hz, 1H, H<sup>2</sup> of Arpy), 7.51 (d, <sup>3</sup>J<sub>H-H</sub> = 8.3 Hz, 1H,

H<sup>8</sup> of Arpy), 7.50 (d, <sup>3</sup>J<sub>H-H</sub> = 8.3 Hz, 1H, H<sup>9</sup> of Arpy), 7.44 (d, <sup>3</sup>J<sub>H-H</sub> = 8.2 Hz, 1H, H<sup>5</sup> of Arpy),

7.18 (d, <sup>3</sup>J<sub>H-H</sub> = 7.5 Hz, 4H, *m*-H of 2,6-*i*-Pr<sub>2</sub>C<sub>6</sub>H<sub>3</sub>), 7.11-7.02 (m, 3H, *p*-H of 2,6-*i*-Pr<sub>2</sub>C<sub>6</sub>H<sub>3</sub> and

H<sup>4</sup> of Arpy), 6.49 (t, <sup>3</sup>J<sub>H-H</sub> = 6.3 Hz, 1H, H<sup>3</sup> of Arpy), 4.13 (m, 8H, N-CH<sub>2</sub> and CH(CH<sub>3</sub>)<sub>2</sub>),

3.37 (t, <sup>3</sup>J<sub>H-H</sub> = 6.1 Hz, 8H, THF), 1.27 (d, <sup>3</sup>J<sub>H-H</sub> = 6.8 Hz, 24 H, CH(CH<sub>3</sub>)<sub>2</sub>), 1.08 (m, 8H,

THF). <sup>13</sup>C NMR (100 MHz, C<sub>6</sub>D<sub>6</sub>, 30 °C) δ 191.7 (d, <sup>1</sup>J<sub>Y-C</sub> = 45.3 Hz, Y-C<sup>12</sup>), 164.5 (d, <sup>2</sup>J<sub>Y-C</sub>

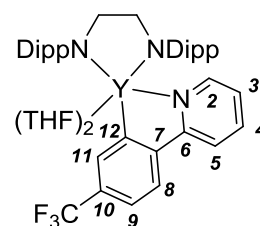

= 2.4 Hz, C<sup>6</sup> of Arpy), 156.6 (d, <sup>2</sup>J<sub>Y-C</sub> = 2.9 Hz, *ipso*-C of 2,6-*i*Pr<sub>2</sub>C<sub>6</sub>H<sub>3</sub>), 149.2 (C<sup>7</sup> of Arpy), 148.4 (C<sup>2</sup> of Arpy), 144.9 (*o*-C of 2,6-*i*Pr<sub>2</sub>C<sub>6</sub>H<sub>3</sub>), 139.1 (C<sup>4</sup> of Arpy), 135.2 (d, <sup>3</sup>J<sub>C-F</sub> = 3.3 Hz, C<sup>2</sup> of Arpy), 126.5 (q, <sup>1</sup>J<sub>C-F</sub> = 273.0 Hz, CF<sub>3</sub>), 123.3 (C<sup>8</sup> of Arpy), 123.3 (*m*-C of 2,6-*i*Pr<sub>2</sub>C<sub>6</sub>H<sub>3</sub>), 122.3 (d, <sup>2</sup>J<sub>C-F</sub> = 3.9 Hz, C<sup>9</sup> of Arpy), 121.5 (*p*-C of 2,6-*i*Pr<sub>2</sub>C<sub>6</sub>H<sub>3</sub>), 121.2 (C<sup>3</sup> of Arpy), 120.2 (C<sup>5</sup> of Arpy), 70.0 (THF), 60.6 (N-CH<sub>2</sub>), 28.3 (CH(CH<sub>3</sub>)<sub>2</sub>), 25.5 (CH(CH<sub>3</sub>)<sub>2</sub>), 24.9 (THF). <sup>13</sup>C NMR signal of *ipso*-C of CF<sub>3</sub> is not able to determine because their signal is overlapped with the signal of C<sub>6</sub>D<sub>5</sub>H. Anal. Calcd for C<sub>46</sub>H<sub>59</sub>F<sub>3</sub>N<sub>3</sub>O<sub>2</sub>Y: C, 66.41; H, 7.15; N, 5.05. Found: C, 66.45; H, 7.51; N, 5.34.

### Preparation of (ArNCH<sub>2</sub>CH<sub>2</sub>NAr)Y(κ-(C<sup>10</sup>,N)-benzo[*h*]quinolinyl)(THF)<sub>2</sub> (3d):

Complex **3d** was obtained quantitatively (59.5 mg, 0.0755 mmol), following similar procedure to the synthesis of **3c**. mp: 95-100 °C (dec.). <sup>1</sup>H NMR (400 MHz, C<sub>6</sub>D<sub>6</sub>, 30 °C) δ 8.56 (dd, <sup>3</sup>J<sub>H-H</sub> = 4.9, 1.4 Hz, 1H, H<sup>2</sup>), 8.51 (d, <sup>3</sup>J<sub>H-H</sub> = 6.0 Hz, 1H, H<sup>9</sup>), 7.71–7.58 (m, 3H, H<sup>4</sup>, H<sup>7</sup>, and H<sup>8</sup>), 7.69 (d, <sup>3</sup>J<sub>H-H</sub> = 8.8 Hz, 1H, H<sup>6</sup>), 7.22 (d, <sup>3</sup>J<sub>H-H</sub> = 8.8 Hz, 1H, H<sup>5</sup>), 7.19 (d, <sup>3</sup>J<sub>H-H</sub> = 7.8 Hz, 4H, *m*-H of 2,6-*i*Pr<sub>2</sub>C<sub>6</sub>H<sub>3</sub>), 7.08 (t, <sup>3</sup>J<sub>H-H</sub> = 7.5 Hz, 2H, *o*-H of 2,6-*i*Pr<sub>2</sub>C<sub>6</sub>H<sub>3</sub>), 6.83 (dd, <sup>3</sup>J<sub>H-H</sub> = 7.9, 4.9 Hz, 1H, H<sup>3</sup>), 4.23 (s, 4H, N-CH<sub>2</sub>), 4.22 (t, <sup>3</sup>J<sub>H-H</sub> = 6.8 Hz, 4H, CH(CH<sub>3</sub>)<sub>2</sub>), 3.42 (s, 8H, THF), 1.20 (d, <sup>3</sup>J<sub>H-H</sub> = 6.8 Hz, 24H, CH(CH<sub>3</sub>)<sub>2</sub>), 1.08 (s, 8H, THF). <sup>13</sup>C NMR (100 MHz, C<sub>6</sub>D<sub>6</sub>, 30 °C): δ 189.1 (d, <sup>1</sup>J<sub>Y-C</sub> = 47.7 Hz, Y-C<sup>10</sup>), 156.9 (*ipso*-C of 2,6-*i*Pr<sub>2</sub>C<sub>6</sub>H<sub>3</sub>), 154.8 (C<sup>10b</sup>), 146.9 (C<sup>2</sup>), 145.1 (*o*-C of 2,6-*i*Pr<sub>2</sub>C<sub>6</sub>H<sub>3</sub>), 138.2 (C<sup>4</sup>), 137.9 (C<sup>9</sup>), 133.6 (C<sup>6a</sup>), 131.4 (C<sup>6</sup>), 128.4 (C<sup>10a</sup>), 127.8 (C<sup>8</sup>), 127.3 (C<sup>4a</sup>), 124.8 (C<sup>7</sup>), 123.3 (*m*-H of 2,6-*i*Pr<sub>2</sub>C<sub>6</sub>H<sub>3</sub>), 122.3 (C<sup>5</sup>), 121.3 (*p*-H of 2,6-*i*Pr<sub>2</sub>C<sub>6</sub>H<sub>3</sub>), 119.6 (C<sup>3</sup>), 69.7 (THF), 60.8 (N-CH<sub>2</sub>), 28.3 (CH(CH<sub>3</sub>)<sub>2</sub>), 25.5 (CH(CH<sub>3</sub>)<sub>2</sub>), 25.1 (THF). Anal. Calcd for C<sub>71</sub>H<sub>60</sub>N<sub>3</sub>O<sub>2</sub>Y: C, 71.65; H, 7.68; N, 5.33. Found: C, 71.43; H, 7.82; N, 5.07.

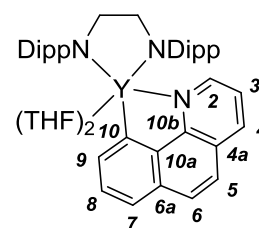

### Preparation of Bis( $\mu,\kappa$ -(C,N)-pyridyl)diyttrium Complex **6a**:

A solution of pyridine (**5a**, 11.3 mg, 0.143 mmol) in benzene (1 mL) was added to a solution of **1** (100 mg, 0.144 mmol) in benzene (1 mL) by pipet in an Ar-filled glovebox. The reaction mixture was stand for 48 h at room temperature to form yellow precipitates. After decantation and washing with pentane (1 mL x 5), yellow powders of **6a** were obtained in 43% yield (38 mg, 0.031 mmol). mp: 79–82 °C (dec.).  $^1\text{H}$  NMR (400 MHz,  $\text{C}_6\text{D}_6$ , 30 °C)  $\delta$  9.18 (d,  $^3J_{\text{H-H}} = 7.4$  Hz, 2H, 3-H of Py), 8.81 (d,  $^3J_{\text{H-H}} = 5.0$  Hz, 2H, 6-H of Py), 7.46 (t,  $^3J_{\text{H-H}} = 7.4$  Hz, 2H, 4-H of Py), 6.99–6.86 (m, 12H, 2,6- $^i\text{Pr}_2\text{C}_6\text{H}_3$ ), 6.80 (t,  $^3J_{\text{H-H}} = 7.4$  Hz, 2H, 5-H of Py), 4.12 (brs, 8H, N- $\text{CH}_2$ ), 3.94 (sept,  $^3J_{\text{H-H}} = 6.8$  Hz, 8H,  $\text{CH}(\text{CH}_3)_2$ ), 2.88 (brs, 8H,  $\alpha$ -THF), 1.13 (d,  $^3J_{\text{H-H}} = 6.8$  Hz, 48H,  $\text{CH}(\text{CH}_3)_2$ ), 0.68 (brs, 8H,  $\beta$ -THF). Anal. Calcd. for  $\text{C}_{70}\text{H}_{98}\text{N}_6\text{O}_2\text{Y}_2$ : C, 68.17; H, 8.01; N, 6.81. Found: C, 68.12; H, 8.00; N, 7.16.

Complexes **6b-6d** were prepared according to the similar procedure to **6a**.

Complex **6b** was obtained in 38% yield (34.2 mg, 0.0271 mmol). mp: 82–86 °C (dec.).  $^1\text{H}$  NMR (400 MHz,  $\text{C}_6\text{D}_6$ , 30 °C)  $\delta$  9.11 (s, 2H, 3-H of 4-MePy), 8.73 (d,  $^3J_{\text{H-H}} = 5.0$  Hz, 2H, 6-H of 4-MePy), 7.04 – 6.80 (m, 12H, 2,6- $^i\text{Pr}_2\text{C}_6\text{H}_3$ ), 6.75 (d,  $^3J_{\text{H-H}} = 5.0$  Hz, 2H, 5-H of 4-MePy), 4.13 (brs, 8H,  $\text{CH}_2$ ), 4.00 (sept,  $^3J_{\text{H-H}} = 6.4$  Hz, 8H,  $\text{CH}(\text{CH}_3)_2$ ), 2.78 (brs, 8H,  $\alpha$ -THF), 2.31 (s, 6H, 4-MePy), 1.16 (br, 48H,  $\text{CH}(\text{CH}_3)_2$ ), 0.61 (brs, 8H,  $\beta$ -THF). Anal. Calcd. for  $\text{C}_{72}\text{H}_{102}\text{N}_6\text{O}_2\text{Y}_2$ : C, 68.55; H, 8.15; N, 6.66. Found: C, 68.41; H, 8.49; N, 6.69.

Complex **6c** was obtained in 66% yield (58.8 mg, 0.0424 mmol). mp: 92–96 °C (dec.).  $^1\text{H}$  NMR (400 MHz,  $\text{C}_6\text{D}_6$ , 30 °C)  $\delta$  9.68 (s, 2H, 3-H of Py), 8.90 (s br, 2H, 6-H of Py), 7.97 (d,  $^3J = 6.6$  Hz, 4H, *o*-H of PhPy), 7.36 (t,  $^3J = 7.3$  Hz, 4H, *m*-H of PhPy), 7.27-7.18 (m, 4H, 5-H of Py and *p*-H of PhPy), 7.02-6.83 (m, 12H, 2,6- $^i\text{Pr}_2\text{C}_6\text{H}_3$ ), 4.60-3.80 (m, 16H,  $\text{CH}(\text{CH}_3)_2$  and N- $\text{CH}_2$ ), 2.90 (brs, 8H,  $\alpha$ -THF), 1.6-0.9 (br, 48H,  $\text{CH}(\text{CH}_3)_2$ ), 0.63 (brs, 8H,  $\beta$ -THF). Anal. Calcd. for  $\text{C}_{82}\text{H}_{106}\text{N}_6\text{O}_2\text{Y}_2$ : C, 71.08; H, 7.71; N, 6.07. Found: C, 70.86; H, 7.42; N, 5.70.

Complex **6d** was obtained in 39% yield (36.3 mg, 0.0281 mmol). mp: 98–103 °C (dec.). <sup>1</sup>H NMR (400 MHz, Toluene-*d*<sub>8</sub>, -60 °C) δ 8.95 (d, <sup>3</sup>*J* = 5.0 Hz, 2H, 6-H of Py), 6.99-6.94 (m, 12H, 2,6-*i*Pr<sub>2</sub>C<sub>6</sub>H<sub>3</sub>), 6.74 (m, 2H, 5-H of Py), 6.25 (d, <sup>3</sup>*J* = 8.4 Hz, 2H, 4-H of Py), 4.39-4.00 (m, 16H, N-CH<sub>2</sub> and CH(CH<sub>3</sub>)<sub>2</sub>), 3.88 (s, 6H, O-CH<sub>3</sub>), 2.48 (brs, 8H, α-THF), 1.44 (br d, <sup>3</sup>*J* = 5.9 Hz, 12H, CH(CH<sub>3</sub>)<sub>2</sub>), 1.34 (brd, <sup>3</sup>*J* = 5.9 Hz, 12H, CH(CH<sub>3</sub>)<sub>2</sub>), 0.87 (brd, <sup>3</sup>*J* = 5.9 Hz, 12H, CH(CH<sub>3</sub>)<sub>2</sub>), 0.70 (brd, <sup>3</sup>*J* = 5.9 Hz, 12H, CH(CH<sub>3</sub>)<sub>2</sub>), 0.56-0.30 (m, 8H, β-THF). Anal. Calcd for C<sub>72</sub>H<sub>101</sub>N<sub>6</sub>O<sub>4</sub>Y<sub>2</sub>: C, 66.91; H, 7.88; N, 6.50. Found: C, 67.16; H, 8.22; N, 6.80.

### Preparation of κ-(C,N)-pyridylttrium Complex **7e**:

A solution of 3,5-lutidine (**5e**, 3.0 mg, 0.028 mmol) in C<sub>6</sub>D<sub>6</sub> (0.5 mL) was added to **1** (20.0 mg, 0.0287 mmol) in C<sub>6</sub>D<sub>6</sub> (0.5 mL) by pipet in an Ar-filled glovebox. The reaction mixture was heated to 60 °C for 24 h to quantitatively form **7e**. Isolation as powder form is difficult due to the high solubility of **7e** in any organic solvents. Complex **7e** was characterized by <sup>1</sup>H and <sup>13</sup>C NMR spectra. <sup>1</sup>H NMR (400 MHz, C<sub>6</sub>D<sub>6</sub>, 30 °C) δ 7.97 (s, 1H, 6-H of 3,5-Me<sub>2</sub>Py), 7.21 (d, <sup>3</sup>*J*<sub>H-H</sub> = 7.5 Hz, 4H, *m*-H of 2,6-*i*Pr<sub>2</sub>C<sub>6</sub>H<sub>3</sub>), 7.10 (t, <sup>3</sup>*J*<sub>H-H</sub> = 7.5 Hz, 2H, *p*-H of 2,6-*i*Pr<sub>2</sub>C<sub>6</sub>H<sub>3</sub>), 6.88 (s, 1H, 4-H of 3,5-Me<sub>2</sub>Py), 4.24 (sept, <sup>3</sup>*J*<sub>H-H</sub> = 6.9 Hz, 4H, CH(CH<sub>3</sub>)<sub>2</sub>), 4.17 (brs, 4H, NCH<sub>2</sub>), 3.48 (brs, 8H, α-THF), 2.65 (s, 3H, 3-Me of 3,5-Me<sub>2</sub>Py), 1.91 (s, 3H, 5-Me of 3,5-Me<sub>2</sub>Py), 1.37 (d, <sup>3</sup>*J*<sub>H-H</sub> = 6.9 Hz, 24H, CH(CH<sub>3</sub>)<sub>2</sub>), 1.24 (brs, 8H, β-THF). <sup>13</sup>C NMR (100 MHz, C<sub>6</sub>D<sub>6</sub>, 30 °C) δ 219.6 (d, <sup>1</sup>*J*<sub>Y-C</sub> = 35.2 Hz, Y-C), 157.1 (d, <sup>2</sup>*J*<sub>Y-C</sub> = 2.8 Hz, *ipso*-C of 2,6-*i*Pr<sub>2</sub>C<sub>6</sub>H<sub>3</sub>), 145.0 (*o*-C of 2,6-*i*Pr<sub>2</sub>C<sub>6</sub>H<sub>3</sub>), 142.4 (6-C of 3,5-Me<sub>2</sub>Py), 140.0 (d, <sup>2</sup>*J*<sub>Y-C</sub> = 2.0 Hz, 3-C of 3,5-Me<sub>2</sub>Py), 133.3 (d, <sup>3</sup>*J*<sub>Y-C</sub> = 1.3 Hz, 4-C of 3,5-Me<sub>2</sub>Py), 129.9 (5-C of 3,5-Me<sub>2</sub>Py), 123.2 (*m*-C of 2,6-*i*Pr<sub>2</sub>C<sub>6</sub>H<sub>3</sub>), 120.9 (*p*-C of 2,6-*i*Pr<sub>2</sub>C<sub>6</sub>H<sub>3</sub>), 69.0 (α-THF), 61.0 (N-CH<sub>2</sub>), 28.4 (CH(CH<sub>3</sub>)<sub>2</sub>), 25.7 (CH(CH<sub>3</sub>)<sub>2</sub>), 25.5 (β-THF), 23.8 (3-Me of 3,5-Me<sub>2</sub>Py), 18.1 (5-Me of 3,5-Me<sub>2</sub>Py). Due to the high solubility of the product, we could not isolate in powder form. The <sup>1</sup>H and <sup>13</sup>C NMR spectra were shown in Figure S4.

### Preparation of (ArNCH<sub>2</sub>CH<sub>2</sub>NAr)Y(CH<sub>2</sub>SiMe<sub>2</sub>Py)(THF)<sub>2</sub> (**8f**):

A solution of pyridine (**5a**, 10.9 mg, 0.0721 mmol) in benzene (0.5 mL) was added to a solution of **1** (50.2 mg, 0.0720 mmol) in benzene (0.5 mL) by pipet in an Ar-filled glovebox. The reaction mixture was stand for 24 h at room temperature, and then all the solvent was evaporated. After washing with (Me<sub>3</sub>Si)<sub>2</sub>O (1 mL x 5), drying the remaining solid in vacuo to give yellow powders of **8f** in 69% yield (37 mg, 0.049 mmol). mp: 111–113 °C (dec.). <sup>1</sup>H NMR (400 MHz, C<sub>6</sub>D<sub>6</sub>, 30 °C) δ 7.97 (d, <sup>3</sup>J<sub>H-H</sub> = 5.2 Hz, 1H, 6-H of Py), 7.20-7.17 (m, 5H, *m*-H of 2,6-<sup>i</sup>Pr<sub>2</sub>C<sub>6</sub>H<sub>3</sub> and 3-H of Py), 7.10 (t, <sup>3</sup>J<sub>H-H</sub> = 7.5 Hz, 2H, *p*-H of 2,6-<sup>i</sup>Pr<sub>2</sub>C<sub>6</sub>H<sub>3</sub>), 6.83 (dt, <sup>3</sup>J<sub>H-H</sub> = 7.6 Hz, <sup>4</sup>J<sub>H-H</sub> = 1.4 Hz, 1H, 4-H of Py), 6.39-6.34 (m, 1H, 5-H of Py), 4.20 (sept, <sup>3</sup>J<sub>H-H</sub> = 6.9 Hz, 4H, CH(CH<sub>3</sub>)<sub>2</sub>), 4.10 (s, 4H, NCH<sub>2</sub>), 3.50 (brs, 8H, α-THF), 1.36 (d, <sup>3</sup>J<sub>H-H</sub> = 6.9 Hz, 24H, CH(CH<sub>3</sub>)<sub>2</sub>), 1.17 (brs, 8H, β-THF), 0.29 (s, 6H, SiMe<sub>2</sub>). <sup>13</sup>C NMR (100 MHz, C<sub>6</sub>D<sub>6</sub>, 30 °C) δ 179.0 (d, <sup>2</sup>J<sub>Y-C</sub> = 1.8 Hz, 2-C of Py), 156.2 (d, <sup>2</sup>J<sub>Y-C</sub> = 2.7 Hz, *ipso*-C of 2,6-<sup>i</sup>Pr<sub>2</sub>C<sub>6</sub>H<sub>3</sub>), 148.8 (6-C of Py), 145.5 (*o*-C of 2,6-<sup>i</sup>Pr<sub>2</sub>C<sub>6</sub>H<sub>3</sub>), 136.2 (4-C of Py), 130.6 (5-C of Py), 123.7 (*m*-C of 2,6-<sup>i</sup>Pr<sub>2</sub>C<sub>6</sub>H<sub>3</sub>), 122.3 (3-C of Py), 121.8 (*p*-C of 2,6-<sup>i</sup>Pr<sub>2</sub>C<sub>6</sub>H<sub>3</sub>), 69.7 (α-THF), 60.8 (N-CH<sub>2</sub>), 28.7 (CH(CH<sub>3</sub>)<sub>2</sub>), 26.0 (CH(CH<sub>3</sub>)<sub>2</sub>), 25.5 (β-THF), 18.1 (d, <sup>1</sup>J<sub>Y-C</sub> = 37.2 Hz, Y-C), 3.06 (SiMe<sub>2</sub>). Anal. Calcd for C<sub>42</sub>H<sub>64</sub>N<sub>3</sub>O<sub>2</sub>SiY: C, 66.38; H, 8.49; N, 5.53. Found: C, 66.35; H, 8.54; N, 5.69.

### Deuterium Labeling Experiment:

Diyttrium complex **3a-d<sub>8</sub>,d<sub>9</sub>,d<sub>10</sub>** (100 mg, 0.0702 mmol) was suspended in C<sub>6</sub>H<sub>6</sub> (2 mL), and CCl<sub>4</sub> (13.0 mg, 0.087 mmol, 1.2 equiv) was added to quench the reaction mixture. After heating the reaction mixture for 24 h at 60 °C, deuterated 6,6'-diphenyl-2,2'-bipyridyl was isolated by silica-gel column chromatography. <sup>1</sup>H NMR (400 MHz, C<sub>6</sub>D<sub>6</sub>, 30 °C) δ 8.61 (d, <sup>3</sup>J<sub>H-H</sub> = 7.2 Hz, 2H, 3-H of Py), 8.18 (s, 1.4H, *o*-Ph), 7.92 (t, <sup>3</sup>J<sub>H-H</sub> = 7.2 Hz, 2H, 4H of Py), 7.79 (d, <sup>3</sup>J<sub>H-H</sub> = 7.2 Hz, 2H, 5-H of Py). The <sup>1</sup>H NMR of the isolated product was shown in Figure S5.



## X-ray Crystallographic Studies

Single crystals of **3e**, **4a-c**, **6a**, **6c**, and **6d** were obtained from the corresponding saturated solution. Suitable crystals were mounted on a CryoLoop (Hampton Research Corp.) with a layer of light mineral oil and placed in a nitrogen stream at 113 K. Crystal data and structure refinement parameters were summarized in Table S3.

The structures of all these complexes were solved by a direct method (SIR92<sup>S6</sup> or SHELXS-97<sup>S7</sup>) and refined on  $F^2$  by full-matrix least-squares methods, using SHELXL-97. Non-hydrogen atoms were anisotropically refined. H-atoms were included in the refinement on calculated positions riding on their carrier atoms. The function minimized was  $[\sum w(F_o^2 - F_c^2)^2]$  ( $w = 1 / [\sigma^2(F_o^2) + (aP)^2 + bP]$ ), where  $P = (\text{Max}(F_o^2, 0) + 2F_c^2) / 3$  with  $\sigma^2(F_o^2)$  from counting statistics. The function  $R1$  and  $wR2$  were  $(\sum ||F_o| - |F_c||) / \sum |F_o|$  and  $[\sum w(F_o^2 - F_c^2)^2 / \sum w(F_o^4)]^{1/2}$ , respectively. The ORTEP-3 program<sup>S8</sup> was used to draw each molecule.

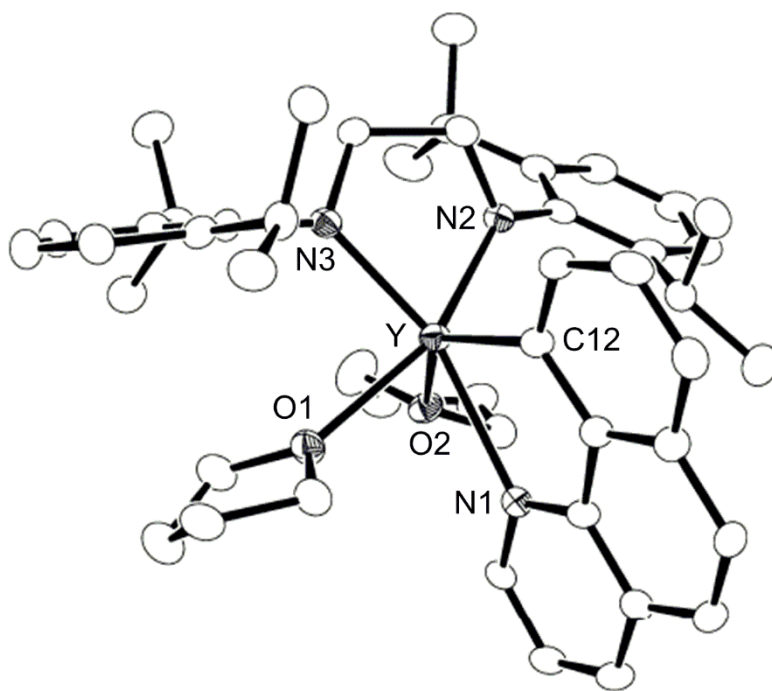

**Figure S1.** ORTEP drawing of complexes **3e** with 30% thermal ellipsoid. All hydrogen atoms and packing solvent molecules are omitted for clarity. Selected bond lengths (Å) and angles (°): Y – N1, 2.631(6); Y – N2, 2.272(6); Y – N3, 2.290(6); Y – C12, 2.497(7); Y – O1, 2.448(5); Y – O2, 2.443(5); N2 – Y – N3, 77.5(2); O1 – Y – O2, 84.95(18).

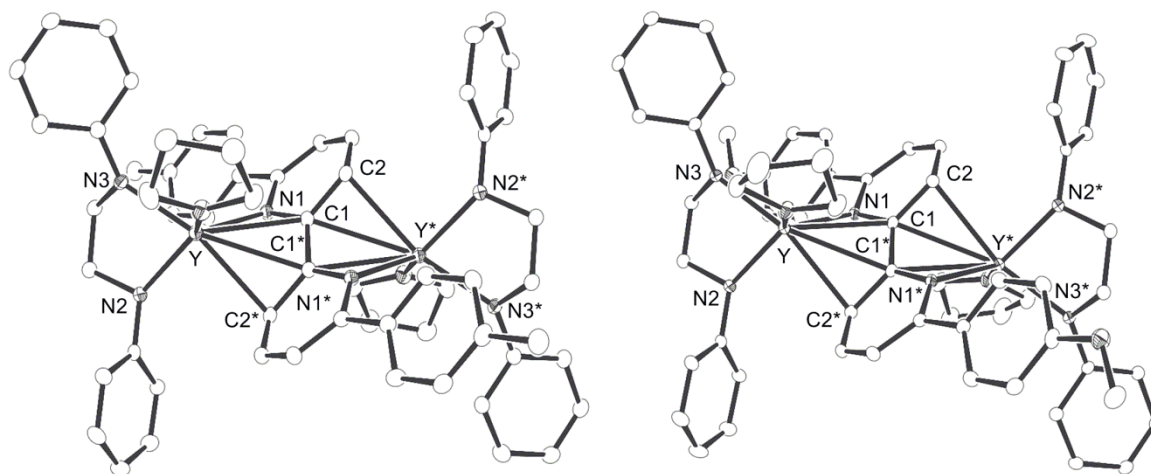

**Figure S2.** ORTEP drawing of complexes **4b** (left) and **4c** (right) with 30% thermal ellipsoid.

All hydrogen atoms and packing solvent molecules are omitted for clarity.

**Table S1.** Selected geometries (bond lengths (Å) and angles (deg)) of complexes **4a-c**.

| complex                | <b>4a</b> | <b>4b</b>             | <b>4c</b> |
|------------------------|-----------|-----------------------|-----------|
| Y—N1                   | 2.344(5)  | 2.335(3)              | 2.333(2)  |
| Y—C1                   | 2.746(5)  | 2.755(4)              | 2.771(2)  |
| Y—C1*                  | 2.857(5)  | 2.860(4)              | 2.888(2)  |
| Y—C2*                  | 2.661(5)  | 2.669(4) <sup>a</sup> | 2.686(3)  |
| N1—C1                  | 1.424(6)  | 1.420(4)              | 1.429(3)  |
| C1—C2                  | 1.476(7)  | 1.465(5)              | 1.470(4)  |
| C1—C1*                 | 1.396(10) | 1.418(7)              | 1.392(5)  |
| Y—N2                   | 2.194(4)  | 2.205(3)              | 2.213(2)  |
| Y—N3                   | 2.192(5)  | 2.200(3)              | 2.183(2)  |
| N1—Y—C2*               | 70.68(16) | 70.63(11)             | 70.14(8)  |
| N2—Y—N3                | 80.78(17) | 79.80(11)             | 80.60(8)  |
| Dihedral angle between |           |                       |           |
| N1—Y—C2* and N1—       | 109.6     | 110.0                 | 110.9     |
| C1—C1*—C2* planes      |           |                       |           |

<sup>a</sup> Y—C2

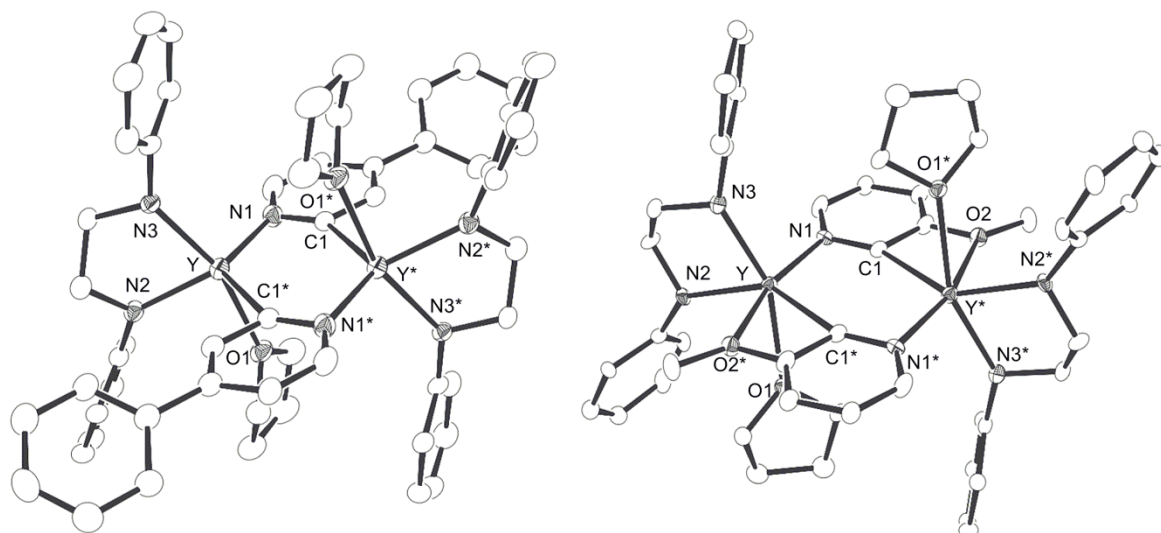

**Figure S3.** ORTEP drawing of complex **6c** (left) and **6d** (right) with 30% thermal ellipsoid. All hydrogen atoms and packing solvent molecules are omitted for clarity.

**Table S2.** Selected geometries (bond lengths (Å) and angles (deg)) of complexes **6a**, **6c**, and **6d**.

| complex   | <b>6a</b> | <b>6c</b>              | <b>6d</b>              |
|-----------|-----------|------------------------|------------------------|
| Y—N1      | 2.328(4)  | 2.352(5)               | 2.366(5)               |
| Y—C1      | 2.681(5)  | 2.735(6) <sup>a)</sup> | 2.850(7) <sup>a)</sup> |
| Y—C1*     | 2.560(5)  | 2.588(6) <sup>b)</sup> | 2.685(7) <sup>b)</sup> |
| N1—C1     | 1.380(6)  | 1.379(7)               | 1.376(8)               |
| Y—N2      | 2.216(4)  | 2.237(5)               | 2.239(6)               |
| Y—N3      | 2.219(4)  | 2.210(5)               | 2.252(5)               |
| Y—O1(THF) | 2.422(3)  | 2.419(4)               | -                      |
| Y—O1*     | -         | -                      | 2.504(5)               |
| Y—O2(THF) | -         | -                      | 2.404(5)               |

<sup>a)</sup> Y—C1\*   <sup>b)</sup> Y—C1

**Table S3.** Crystal Data and Data Collection Parameters for **3e**, **4a-c**, **6a**, **6c**, and **6d**.<sup>a) b)</sup>

| compound                                                          | <b>3e</b>                                                       | <b>4a</b>                                                                                                        |
|-------------------------------------------------------------------|-----------------------------------------------------------------|------------------------------------------------------------------------------------------------------------------|
| empirical formula                                                 | C <sub>47</sub> H <sub>62</sub> N <sub>3</sub> O <sub>2</sub> Y | C <sub>82</sub> H <sub>108</sub> N <sub>6</sub> O <sub>2</sub> Y <sub>2</sub> ·2(C <sub>6</sub> H <sub>6</sub> ) |
| formula weight                                                    | 789.93                                                          | 1543.78                                                                                                          |
| crystal system                                                    | <i>monoclinic</i>                                               | <i>monoclinic</i>                                                                                                |
| space group                                                       | <i>P2<sub>1</sub>/n</i> (#14)                                   | <i>P2<sub>1</sub>/n</i> (#14)                                                                                    |
| <i>a</i> , Å                                                      | 12.902(11)                                                      | 13.160(7)                                                                                                        |
| <i>b</i> , Å                                                      | 21.925(16)                                                      | 16.367(8)                                                                                                        |
| <i>c</i> , Å                                                      | 16.088(13)                                                      | 19.701(10)                                                                                                       |
| $\alpha$ , deg.                                                   | -                                                               | -                                                                                                                |
| $\beta$ , deg.                                                    | 106.222(7)                                                      | 103.837(4)                                                                                                       |
| $\gamma$ , deg.                                                   | -                                                               | -                                                                                                                |
| <i>V</i> , Å <sup>3</sup>                                         | 4370(6)                                                         | 4120(4)                                                                                                          |
| <i>Z</i>                                                          | 4                                                               | 2                                                                                                                |
| <i>D</i> <sub>calcd</sub> , g/cm <sup>3</sup>                     | 1.201                                                           | 1.244                                                                                                            |
| $\mu$ [Mo-K $\alpha$ ], mm <sup>-1</sup>                          | 1.375                                                           | 1.453                                                                                                            |
| crystal size, mm <sup>3</sup>                                     | 0.30×0.20×0.05                                                  | 0.28×0.26×0.23                                                                                                   |
| <i>T</i> , K                                                      | 113(2)                                                          | 113(2)                                                                                                           |
| $\theta$ range for data collection, deg.                          | 3.23 to 27.23                                                   | 3.01 to 26.00                                                                                                    |
| no. of reflections measured                                       | 36919                                                           | 35619                                                                                                            |
| unique data ( <i>R</i> <sub>int</sub> )                           | 8565 (0.1279)                                                   | 8083 (0.1303)                                                                                                    |
| data / restraints / parameters                                    | 8565 / 0 / 486                                                  | 8083 / 12 / 471                                                                                                  |
| <i>R</i> 1 ( <i>I</i> > 2.0 $\sigma$ ( <i>I</i> )) <sup>a)</sup>  | 0.1188                                                          | 0.0948                                                                                                           |
| <i>wR</i> 2 ( <i>I</i> > 2.0 $\sigma$ ( <i>I</i> )) <sup>b)</sup> | 0.2648                                                          | 0.1451                                                                                                           |
| <i>R</i> 1 (all data) <sup>a)</sup>                               | 0.1641                                                          | 0.1412                                                                                                           |
| <i>wR</i> 2 (all data) <sup>b)</sup>                              | 0.3028                                                          | 0.1664                                                                                                           |
| GOF on <i>F</i> <sup>2</sup>                                      | 1.111                                                           | 1.127                                                                                                            |
| $\Delta\rho$ , e Å <sup>-3</sup>                                  | 1.87, -0.95                                                     | 0.51, -0.495                                                                                                     |

a)  $R1 = (\sum||Fo| - |Fc|)/(\sum|Fo|)$  b)  $wR2 = [\{\sum w(Fo^2 - Fc^2)^2\}/\{\sum w(Fo^4)\}]^{1/2}$

**Table S3 (continued).** Crystal Data and Data Collection Parameters for **3e**, **4a-c**, **6a**, **6c**, and **6d**.<sup>a) b)</sup>

| compound                                                 | <b>4b</b>                                                                                                         | <b>4c</b>                                                                                                         |
|----------------------------------------------------------|-------------------------------------------------------------------------------------------------------------------|-------------------------------------------------------------------------------------------------------------------|
| empirical formula                                        | C <sub>84</sub> H <sub>110</sub> N <sub>6</sub> O <sub>2</sub> Y <sub>2</sub> · 2(C <sub>7</sub> H <sub>8</sub> ) | C <sub>84</sub> H <sub>110</sub> N <sub>6</sub> O <sub>4</sub> Y <sub>2</sub> · 2(C <sub>7</sub> H <sub>8</sub> ) |
| formula weight                                           | 1599.88                                                                                                           | 1631.94                                                                                                           |
| crystal system                                           | <i>monoclinic</i>                                                                                                 | <i>monoclinic</i>                                                                                                 |
| space group                                              | <i>P2<sub>1</sub>/n</i> (#14)                                                                                     | <i>P2<sub>1</sub>/n</i> (#14)                                                                                     |
| <i>a</i> , Å                                             | 13.324(6)                                                                                                         | 13.2137(9)                                                                                                        |
| <i>b</i> , Å                                             | 16.849(7)                                                                                                         | 17.8164(9)                                                                                                        |
| <i>c</i> , Å                                             | 19.590(8)                                                                                                         | 18.8346(12)                                                                                                       |
| <i>α</i> , deg.                                          | -                                                                                                                 | -                                                                                                                 |
| <i>β</i> , deg.                                          | 104.350(5)                                                                                                        | 102.372(3)                                                                                                        |
| <i>γ</i> , deg.                                          | -                                                                                                                 | -                                                                                                                 |
| <i>V</i> , Å <sup>3</sup>                                | 4261(3)                                                                                                           | 4331.1(5)                                                                                                         |
| <i>Z</i>                                                 | 2                                                                                                                 | 2                                                                                                                 |
| <i>D</i> <sub>calcd</sub> , g/cm <sup>3</sup>            | 1.247                                                                                                             | 1.251                                                                                                             |
| <i>μ</i> [Mo-Kα], mm <sup>-1</sup>                       | 1.4095                                                                                                            | 1.3896                                                                                                            |
| crystal size, mm <sup>3</sup>                            | 0.32×0.29×0.06                                                                                                    | 0.47×0.38×0.10                                                                                                    |
| <i>T</i> , K                                             | 113(2)                                                                                                            | 113(2)                                                                                                            |
| <i>θ</i> range for data collection, deg.                 | 3.16 to 27.49                                                                                                     | 3.11 to 27.47                                                                                                     |
| no. of reflections measured                              | 40751                                                                                                             | 41389                                                                                                             |
| unique data ( <i>R</i> <sub>int</sub> )                  | 9727 (0.0782)                                                                                                     | 9871 (0.0598)                                                                                                     |
| data / restraints / parameters                           | 9727 / 0 / 487                                                                                                    | 9871 / 0 / 496                                                                                                    |
| <i>R</i> 1 ( <i>I</i> > 2.0σ( <i>I</i> )) <sup>a)</sup>  | 0.0661                                                                                                            | 0.0498                                                                                                            |
| <i>wR</i> 2 ( <i>I</i> > 2.0σ( <i>I</i> )) <sup>b)</sup> | 0.1386                                                                                                            | 0.1025                                                                                                            |
| <i>R</i> 1 (all data) <sup>a)</sup>                      | 0.1024                                                                                                            | 0.0681                                                                                                            |
| <i>wR</i> 2 (all data) <sup>b)</sup>                     | 0.1626                                                                                                            | 0.1130                                                                                                            |
| GOF on <i>F</i> <sup>2</sup>                             | 1.061                                                                                                             | 1.093                                                                                                             |
| Δρ, e Å <sup>-3</sup>                                    | 1.45, -0.75                                                                                                       | 0.78, -0.79                                                                                                       |

a)  $R1 = (\sum ||Fo| - |Fc||) / (\sum |Fo|)$  b)  $wR2 = [ \{ \sum w(Fo^2 - Fc^2)^2 \} / \{ \sum w(Fo^4) \} ]^{1/2}$

**Table S3 (continued).** Crystal Data and Data Collection Parameters for **3e**, **4a-c**, **6a**, **6c**, and **6d**.<sup>a) b)</sup>

| compound                                                          | <b>6a</b>                                                                     | <b>6c</b>                                                                                                        |
|-------------------------------------------------------------------|-------------------------------------------------------------------------------|------------------------------------------------------------------------------------------------------------------|
| empirical formula                                                 | C <sub>70</sub> H <sub>100</sub> N <sub>6</sub> O <sub>2</sub> Y <sub>2</sub> | C <sub>82</sub> H <sub>106</sub> N <sub>6</sub> O <sub>2</sub> Y <sub>2</sub> ·2(C <sub>6</sub> H <sub>6</sub> ) |
| formula weight                                                    | 1235.38                                                                       | 1543.83                                                                                                          |
| crystal system                                                    | <i>monoclinic</i>                                                             | <i>monoclinic</i>                                                                                                |
| space group                                                       | <i>C2/c</i> (#15)                                                             | <i>P2<sub>1</sub>/n</i> (#14)                                                                                    |
| <i>a</i> , Å                                                      | 16.313(7)                                                                     | 15.639(7)                                                                                                        |
| <i>b</i> , Å                                                      | 20.362(9)                                                                     | 17.514(8)                                                                                                        |
| <i>c</i> , Å                                                      | 20.231(9)                                                                     | 16.240(8)                                                                                                        |
| $\alpha$ , deg.                                                   | -                                                                             | -                                                                                                                |
| $\beta$ , deg.                                                    | 92.019(4)                                                                     | 104.711(4)                                                                                                       |
| $\gamma$ , deg.                                                   | -                                                                             | -                                                                                                                |
| <i>V</i> , Å <sup>3</sup>                                         | 6716(5)                                                                       | 4302(3)                                                                                                          |
| <i>Z</i>                                                          | 4                                                                             | 2                                                                                                                |
| <i>D</i> <sub>calcd</sub> , g/cm <sup>3</sup>                     | 1.222                                                                         | 1.192                                                                                                            |
| $\mu$ [Mo-K $\alpha$ ], mm <sup>-1</sup>                          | 1.766                                                                         | 1.3935                                                                                                           |
| crystal size, mm <sup>3</sup>                                     | 0.20×0.08×0.08                                                                | 0.21×0.17×0.10                                                                                                   |
| <i>T</i> , K                                                      | 113(2)                                                                        | 113(2)                                                                                                           |
| $\theta$ range for data collection, deg.                          | 3.15 to 26.00                                                                 | 3.13 to 27.47                                                                                                    |
| no. of reflections measured                                       | 29121                                                                         | 35630                                                                                                            |
| unique data ( <i>R</i> <sub>int</sub> )                           | 6581 (0.1065)                                                                 | 7992 (0.1016)                                                                                                    |
| data / restraints / parameters                                    | 6581 / 0 / 369                                                                | 7992 / 0 / 501                                                                                                   |
| <i>R</i> 1 ( <i>I</i> > 2.0 $\sigma$ ( <i>I</i> )) <sup>a)</sup>  | 0.0784                                                                        | 0.1176                                                                                                           |
| <i>wR</i> 2 ( <i>I</i> > 2.0 $\sigma$ ( <i>I</i> )) <sup>b)</sup> | 0.1337                                                                        | 0.1838                                                                                                           |
| <i>R</i> 1 (all data) <sup>a)</sup>                               | 0.1091                                                                        | 0.1348                                                                                                           |
| <i>wR</i> 2 (all data) <sup>b)</sup>                              | 0.1492                                                                        | 0.1930                                                                                                           |
| GOF on <i>F</i> <sup>2</sup>                                      | 1.109                                                                         | 1.290                                                                                                            |
| $\Delta\rho$ , e Å <sup>-3</sup>                                  | 1.214, -0.568                                                                 | 0.75, -0.69                                                                                                      |

a)  $R1 = (\sum||Fo| - |Fc|)| / (\sum|Fo|)$  b)  $wR2 = [ \{ \sum w(Fo^2 - Fc^2)^2 \} / \{ \sum w(Fo^4) \} ]^{1/2}$

**Table S3 (continued).** Crystal Data and Data Collection Parameters for **3e**, **4a-c**, **6a**, **6c**, and **6d**.<sup>a) b)</sup>

| compound                                                 | <b>6d</b>                                                                     |
|----------------------------------------------------------|-------------------------------------------------------------------------------|
| empirical formula                                        | C <sub>72</sub> H <sub>104</sub> N <sub>6</sub> O <sub>4</sub> Y <sub>2</sub> |
| formula weight                                           | 1295.46                                                                       |
| crystal system                                           | <i>monoclinic</i>                                                             |
| space group                                              | <i>P2<sub>1</sub>/n</i> (#14)                                                 |
| <i>a</i> , Å                                             | 13.492(12)                                                                    |
| <i>b</i> , Å                                             | 13.673(12)                                                                    |
| <i>c</i> , Å                                             | 19.029(18)                                                                    |
| <i>α</i> , deg.                                          | -                                                                             |
| <i>β</i> , deg.                                          | 101.334(9)                                                                    |
| <i>γ</i> , deg.                                          | -                                                                             |
| <i>V</i> , Å <sup>3</sup>                                | 3442(5)                                                                       |
| <i>Z</i>                                                 | 2                                                                             |
| <i>D</i> <sub>calcd</sub> , g/cm <sup>3</sup>            | 1.250                                                                         |
| <i>μ</i> [Mo-Kα], mm <sup>-1</sup>                       | 1.7304                                                                        |
| crystal size, mm <sup>3</sup>                            | 0.17×0.15×0.05                                                                |
| <i>T</i> , K                                             | 113(2)                                                                        |
| <i>θ</i> range for data collection, deg.                 | 3.17 to 27.48                                                                 |
| no. of reflections measured                              | 27295                                                                         |
| unique data ( <i>R</i> <sub>int</sub> )                  | 6063 (0.1436)                                                                 |
| data / restraints / parameters                           | 6060 / 0 / 379                                                                |
| <i>R</i> 1 ( <i>I</i> > 2.0σ( <i>I</i> )) <sup>a)</sup>  | 0.0914                                                                        |
| <i>wR</i> 2 ( <i>I</i> > 2.0σ( <i>I</i> )) <sup>b)</sup> | 0.1563                                                                        |
| <i>R</i> 1 (all data) <sup>a)</sup>                      | 0.1414                                                                        |
| <i>wR</i> 2 (all data) <sup>b)</sup>                     | 0.1837                                                                        |
| GOF on <i>F</i> <sup>2</sup>                             | 1.063                                                                         |
| Δρ, e Å <sup>-3</sup>                                    | 1.51, -0.64                                                                   |

a)  $R1 = (\sum ||Fo| - |Fc||) / (\sum |Fo|)$     b)  $wR2 = [ \{ \sum w(Fo^2 - Fc^2)^2 \} / \{ \sum w(Fo^4) \} ]^{1/2}$



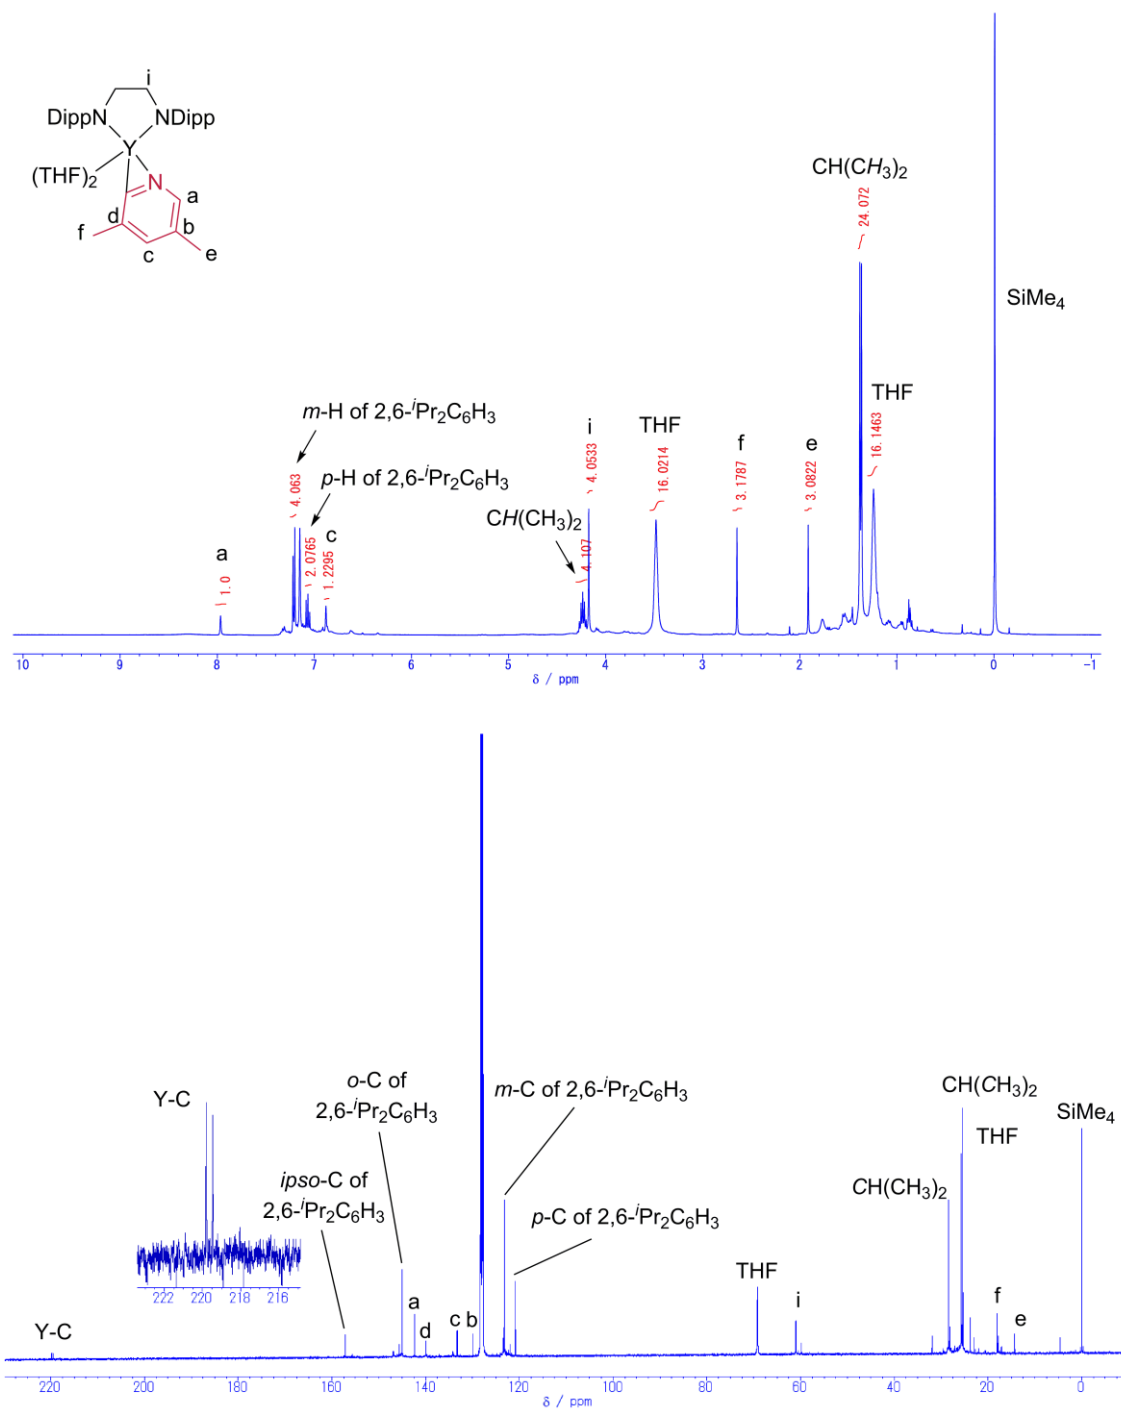

**Figure S4.**  $^1\text{H}$  NMR (top) and  $^{13}\text{C}$  NMR (bottom) spectra of **7e**.

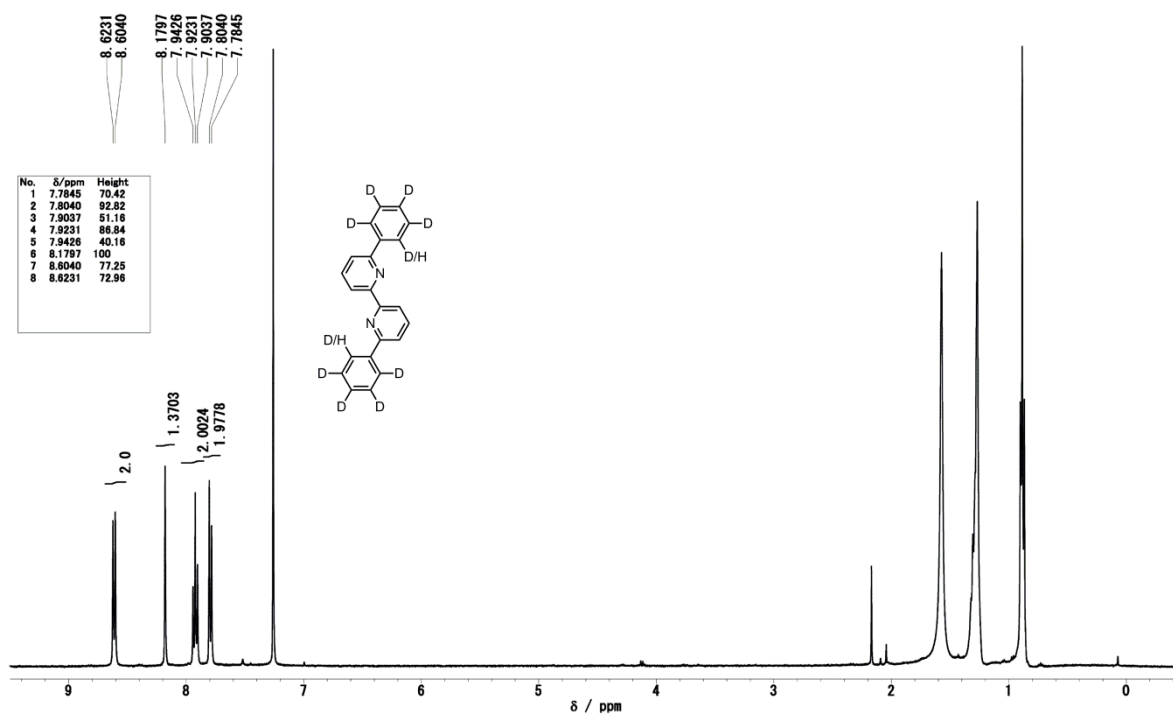

**Figure S5.**  $^1\text{H}$  NMR spectrum of deuterated 6,6'-diphenyl-2,2'-bipyridyl.

## References

- S1) Abrams, M. B.; Scott, B. L.; Baker, R. T. *Organometallics* **2000**, *19*, 4944.
- S2) Mazzeo, M.; Lamberti, M.; D'Auria, I.; Milione, S.; Peters, J. C.; Pellecchia, C. *J. Polym. Sci., Part A: Polym. Chem.* **2010**, *48*, 1374.
- S3) Eppinger, J.; Nikolaidis, K. R.; Zhang-Prese, M.; Riederer, F. A.; Rabe, G. W.; Rheingold, A. L. *Organometallics* **2008**, *27*, 736.
- S4) Kozhushkov, S. I.; Yufit, D. S.; Ackermann, L. *Org. Lett.* **2008**, *10*, 3409.
- S5) Pangborn, A. B.; Giardello, M. A.; Grubbs, R. H.; Rosen, R. K.; Timmers, F. J. *Organometallics* **1996**, *15*, 1518.
- S6) Altomare, A.; Burla, M. C.; Camalli, M.; Cascarano, G. L.; Giacovazzo, C.; Guagliardi, A.; Polidori, G. *J. Appl. Cryst.* **1994**, *27*, 435.
- S7) Sheldrich, G. M. *Acta Cryst.* **2008**, *A64*, 112.
- S8) Farrugia, L. J. *J. Appl. Cryst.* **1999**, *32*, 837.
